# Supplementary material
Source: publisher figshare collection journal article supplement (https://sage.figshare.com/ndownloader/files/14210939)
Supplement: Supplementary file 1 [file 14210939]

Table S1

*Meta-Analytic Results: Overall Standardized Mean Differences for Reading Accuracy, Reading Fluency, and Reading Comprehension*

| Reading Outcome       | <i>k</i> | <i>n</i> | <i>Effect Size</i> | <i>SE</i> | <i>z</i> | <i>p</i> |
|-----------------------|----------|----------|--------------------|-----------|----------|----------|
| Reading Accuracy      | 22       | 881      | 1.221              | 0.140     | 8.729    | < .0001  |
| Reading Fluency       | 9        | 185      | 0.802              | 0.108     | 7.401    | < .0001  |
| Reading Comprehension | 16       | 763      | 0.499              | 0.117     | 4.257    | < .0001  |

Table S2

*Meta-Analytic Results: Population Intervals and Heterogeneity Analyses for Reading Accuracy, Reading Fluency, and Reading Comprehension*

| Reading Outcome       | $PI_{lower}^a$ | $PI_{upper}^a$ | $I^2$ (%) | $Q$    | $p$     |
|-----------------------|----------------|----------------|-----------|--------|---------|
| Reading Accuracy      | 0.159          | 2.283          | 81.70     | 79.551 | < .0001 |
| Reading Fluency       | 0.779          | 0.824          | 0.120     | 7.761  | 0.4572  |
| Reading Comprehension | -0.227         | 1.225          | 75.14     | 53.859 | < .0001 |

<sup>a</sup>These population intervals are based on 95% confidence intervals.

Table S3

*Sensitivity Analyses for Different Correlation Values: Overall Standardized Mean Differences for Reading Accuracy, Reading Fluency, and Reading Comprehension*

| Correlation values | Reading Accuracy   |          | Reading Fluency    |          | Reading Comprehension |          |
|--------------------|--------------------|----------|--------------------|----------|-----------------------|----------|
|                    | <i>Effect Size</i> | <i>p</i> | <i>Effect Size</i> | <i>p</i> | <i>Effect Size</i>    | <i>p</i> |
| 0                  | 1.219              | <.0001   | 0.804              | <.0001   | 0.494                 | <.0001   |
| 0.2                | 1.223              | <.0001   | 0.803              | <.0001   | 0.504                 | <.0001   |
| 0.4                | 1.228              | <.0001   | 0.806              | <.0001   | 0.515                 | <.0001   |
| 0.6                | 1.233              | <.0001   | 0.808              | <.0001   | 0.526                 | <.0001   |
| 0.8                | 1.238              | <.0001   | 0.809              | <.0001   | 0.538                 | <.0001   |
| 1                  | 1.242              | <.0001   | 0.809              | <.0001   | 0.549                 | <.0001   |

Table S4

*Results of Publication Bias Analyses*

| Outcome Measures      | Fail-Safe N | Egger's Method |       | Rank Correlation Test |       | “Trim and Fill” Procedure |                        |
|-----------------------|-------------|----------------|-------|-----------------------|-------|---------------------------|------------------------|
|                       |             | $z$            | $p$   | Kendall's tau         | $p$   | Imputed                   | Corrected effect sizes |
| Reading Accuracy      | 2897        | 3.008          | 0.003 | 0.290                 | 0.062 | 4                         | 1.046                  |
| Reading Fluency       | 178         | 1.154          | 0.248 | 0.444                 | 0.119 | -                         | -                      |
| Reading Comprehension | 304         | 3.423          | 0.000 | 0.433                 | 0.020 | 8                         | 0.133                  |

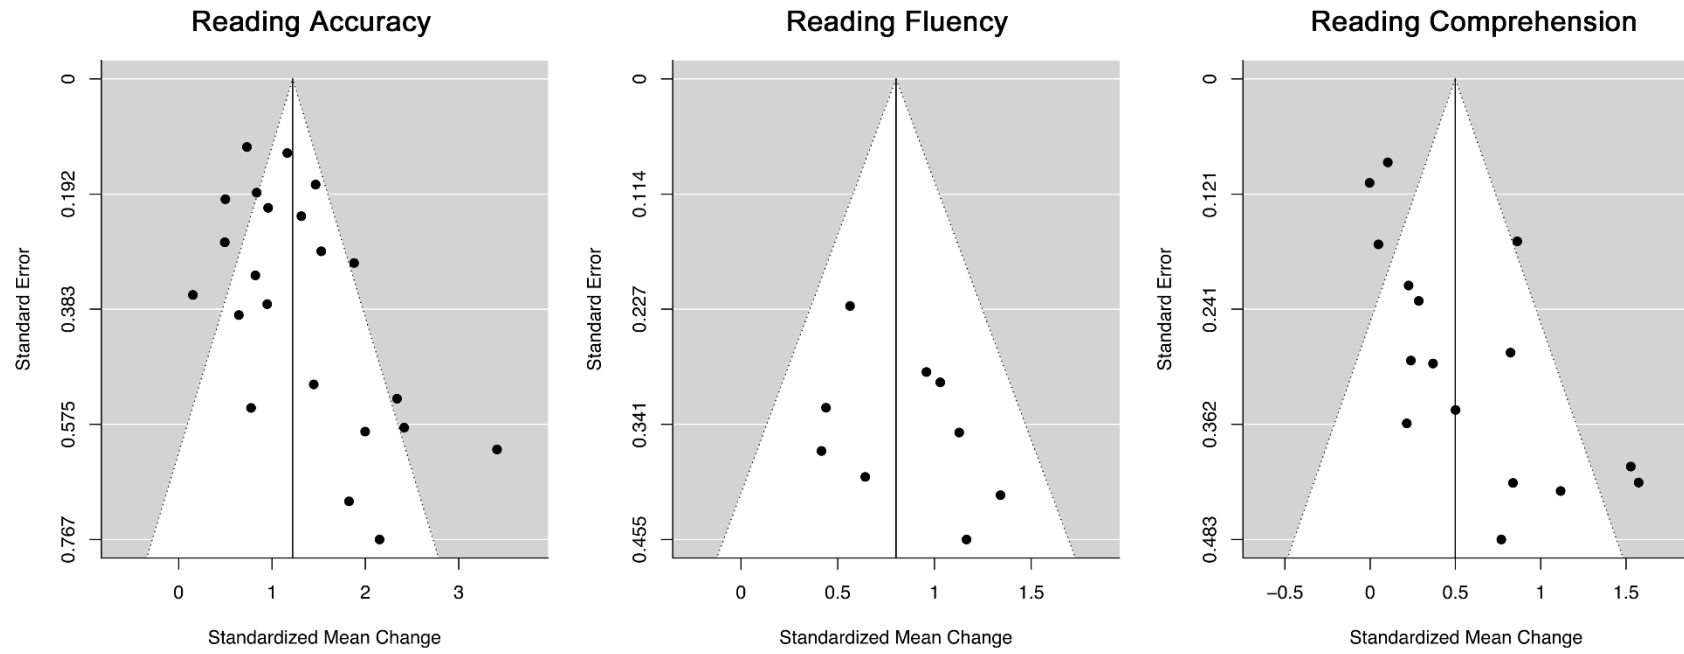

Figure S1. *Funnel plots for reading accuracy, reading fluency, and reading comprehension.*

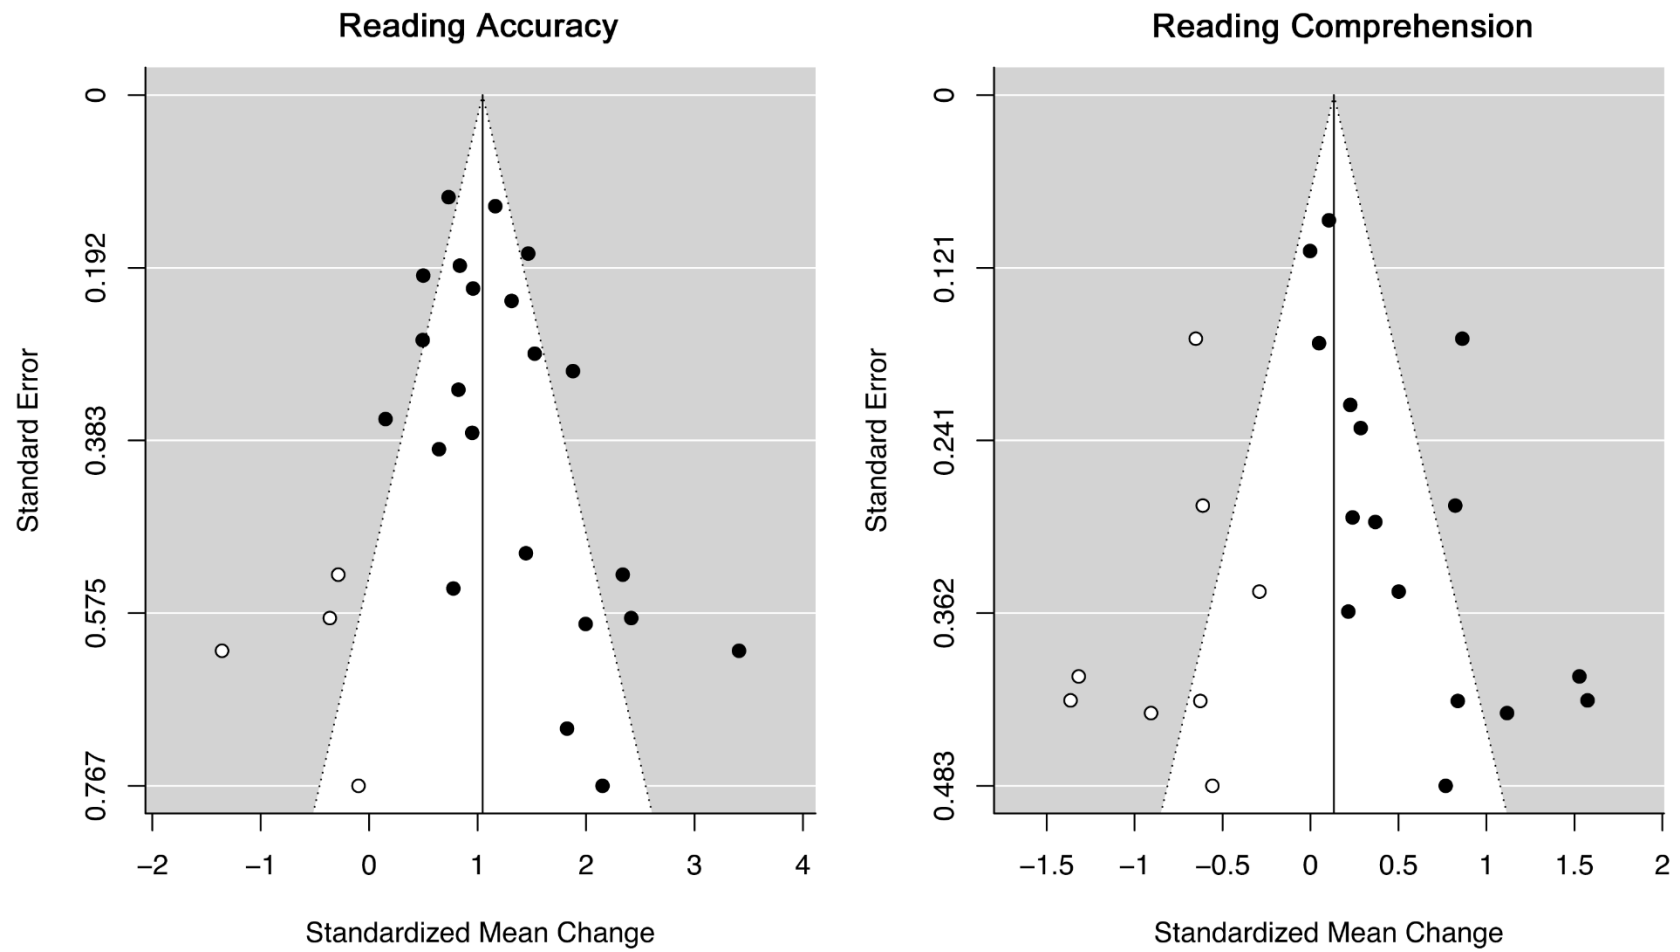

Figure S2. *Funnel plots with imputed samples for reading accuracy and reading comprehension.*

Appendix A

*Participant Characteristics in Each Study Included in the Meta-Analysis*

| Study                        | <i>n</i> <sup>a</sup> | Grade   | Mean age in year<br>(age range) | First Language                                                                                | Students' Risk Status |
|------------------------------|-----------------------|---------|---------------------------------|-----------------------------------------------------------------------------------------------|-----------------------|
| Barber et al. (2014)         | 236 (484)             | 6, 7    | -                               | Mix (Spanish, African languages,<br>Asian languages, multiethnic)                             | At risk               |
| Begeny et al. (2012)         | 13 (21)               | 2       | 7.76                            | Spanish                                                                                       | Not at risk           |
| Booth (2014)                 | 12 (24)               | 8       | (12-14)                         | Mix (Spanish, Arabic, Vietnamese,<br>Portuguese, Somali, Gujarati)                            | Not at risk           |
| Dussling (2016)              | 7                     | 1       | 6.19 (6-6.58)                   | Mix (Tamil, Bosnian, Turkish,<br>Russian, French, Lingala, Tshiluba)                          | At risk               |
| Kemp (2006)                  | 39 (158)              | 3       | -                               | Mix (Spanish, Asian languages,<br>African languages)                                          | Not at risk           |
| La Von Bridges (2006)        | 18 (38)               | 4, 5, 6 | -                               | Mix (Spanish, Tagalog, Hmong,<br>Samoan, Lao, Rumanian, Korean,<br>Russian, Albanian, Arabic) | At risk               |
| Leafstedt et al. (2004)      | 16                    | K       | -                               | Spanish                                                                                       | At risk               |
| Linan-Thompson et al. (2003) | (8) 26                | 2       | -                               | Spanish                                                                                       | At risk               |
| Lovett et al. (2008)         | 60 (166)              | 2-8     | 10.22                           | Mix (Portuguese, Spanish, Tagalog,<br>Italian, Arabic, Syrian, Urdu)                          | At risk               |
| McElvain (2010)              | 75 (150)              | 4-6     | (9-12)                          | Mix (Spanish, Chinese,<br>Vietnamese, Japanese, Korean)                                       | At risk               |
| McMaster et al. (2008)       | 20 (40)               | K       | 5.78                            | Not Reported                                                                                  | Not at risk           |
| Nelson et al. (2011)         | 93                    | K       | -                               | Spanish                                                                                       | Not at risk           |
| Rodriguez et al. (2012)      | 14 (28)               | 1       | 7 (6-8)                         | Spanish                                                                                       | Not at risk           |
| Swartzendruber (2007)        | 9 (35)                | 2       | (7-9)                           | Not Reported                                                                                  | At risk               |

| Study                    | <i>n</i> <sup>a</sup>                                                      | Grade |                  | First Language                                      | Students' Risk Status          |
|--------------------------|----------------------------------------------------------------------------|-------|------------------|-----------------------------------------------------|--------------------------------|
| Solari & Gerber (2008)   | T1 at risk: 7<br>T1 not at risk: 13<br>T2 at risk: 7<br>T2 not at risk: 14 | K     | 5.5              | Spanish                                             | Mix of at risk and not at risk |
| Vadasy & Sanders (2010)  | 38                                                                         | K     | (4-7)            | Mix (Spanish, Vietnamese, Chinese, Somali, Tagalog) | Not at risk                    |
| Vadasy & Sanders (2011)  | 48                                                                         | 1     | -                | Mix (Spanish, Vietnamese, Chinese, Somali, Tagalog) | At risk                        |
| Vadasy & Sanders (2015)  | T1: 51<br>T2: 49                                                           | K     | 5.51 (5.06-6.21) | Mix of 17 languages                                 | Not at risk                    |
| Vadasy et al. (2015)     | T1: 163<br>T2: 161                                                         | K     | 5.61 (4.69-7.79) | Mix (Spanish, African languages, Asian languages)   | Not at risk                    |
| Vanderwood et al. (2014) | 12 (105)                                                                   | 1     | (6-7)            | Spanish and African Languages                       | Mix of at risk and not at risk |
| Vaughn et al. (2006a)    | 43 (91)                                                                    | 1     | 6.6              | Spanish                                             | At risk                        |
| Vaughn et al. (2006b)    | 22 (41)                                                                    | 1     | 6.59             | Spanish                                             | At risk                        |
| Vaughn et al. (2017)     | 236 (1629)                                                                 | 8     | -                | Mostly Spanish                                      |                                |
| Villanueva (2015)        | T1:21<br>T2: 21                                                            | 2     | -                | Not Reported                                        | Not at risk                    |
| Walter (2010)            | 20 (20)                                                                    | K     | -                | Spanish                                             | At risk                        |
| Wanzek & Roberts (2012)  | T1: 11<br>T2: 15<br>T3: 11                                                 | 4     | -                | Spanish                                             | At risk                        |

*Note.* <sup>a</sup>The number outside the bracket refers to the number of ELLs in the experimental group. The number inside the bracket refers to the total number of participants in the intervention. K = Kindergarten; T1 = treatment 1; T2 = treatment 2; T3 = treatment 3.



## Appendix B

### *Information on the Moderators Used in the Meta-Analysis*

| Study                | Reading Outcome(s)     | Outcome Measure(s)                                                                                | Primary skill targeted in intervention | Number of students in each group | Sessions per week | Minutes per session | Number of weeks | Total minutes of intervention |
|----------------------|------------------------|---------------------------------------------------------------------------------------------------|----------------------------------------|----------------------------------|-------------------|---------------------|-----------------|-------------------------------|
| Barber et al. (2015) | Comprehension          | Gates-McGinitie Reading Comprehension Test, History Comprehension Assessment and MAP Reading Test | Comprehension                          | Not reported                     | 5                 | 90                  | 7               | 3150                          |
| Begeny et al. (2012) | Fluency                | GORT- Fluency                                                                                     | Fluency                                | 1                                | 2-3               | 10                  | 5-7 months      | 385                           |
| Booth (2014)         | Comprehension          | No name standardized measure consisting of a passage and questions                                | Vocabulary                             | 12                               | 5                 | 10-15               | 3               | 150-225                       |
| Dussling (2016)      | Real word, Nonword     | WRMT-R/NU Word ID and Word Attack                                                                 | Phonics                                | 4 or 5                           | 5                 | 30                  | 6               | 900                           |
| Kemp (2006)          | Fluency, comprehension | TOWRE (SWE and PDE), DIBELS ORF, Stanford Diagnostic Reading Test                                 | Fluency                                | 1                                | 4                 | 20                  | 4 months        | 1280                          |

| Study                        | Reading Outcome(s)                | Outcome Measure(s)                                                       | Primary skill targeted in intervention | Number of students in each group | Sessions per week | Minutes per session | Number of weeks | Total minutes of intervention |
|------------------------------|-----------------------------------|--------------------------------------------------------------------------|----------------------------------------|----------------------------------|-------------------|---------------------|-----------------|-------------------------------|
| La Von Bridges (2006)        | Fluency, comprehension            | Adapted Durrell Reading Test, DIBELS ORF                                 | Mix (Vocabulary, Fluency)              | 4-9                              | 5                 | 60                  | 10              | 3000                          |
| Leafstedt et al. (2014)      | Real word, nonword                | WJ-III Word ID and Word Attack                                           | PA                                     | 3 to 5                           | 2                 | 15                  | 10              | 300                           |
| Linan-Thompson et al. (2003) | Nonword, comprehension, fluency   | WRMT-R Word Attack, Passage Comprehension, Test of Reading Fluency       | Mix (fluency, PA, phonics)             | 1 to 3                           | 5                 | 30                  | 13              | 1950                          |
| Lovett et al. (2008)         | Real word, nonword, comprehension | WRMT-R Word ID, Word Attack, and Passage Comprehension<br>WRAT-3 Reading | Phonics                                | 4 to 8                           | 4.5               | 60                  | Not reported    | 6300                          |
| McElvain (2010)              | Comprehension                     | QRI-3, CELDT                                                             | Comprehension                          | 4 or 5                           | Not reported      | 60                  | 7 months        | Not reported                  |
| McMaster et al. (2008)       | Real word, nonword                | Word identification, Word attack                                         | Mix (PA, word)                         | Whole class                      | 4                 | 25                  | 18              | 1800                          |
| Nelson et al. (2011)         | Combined                          | WRMT-R/NU Word ID and Word Attack                                        | Vocabulary                             | 2 to 5                           | 5                 | 20                  | 20              | 2000                          |

| Study                    | Reading Outcome(s)                | Outcome Measure(s)                                        | Primary skill targeted in intervention | Number of students in each group | Sessions per week | Minutes per session | Number of weeks | Total minutes of intervention |
|--------------------------|-----------------------------------|-----------------------------------------------------------|----------------------------------------|----------------------------------|-------------------|---------------------|-----------------|-------------------------------|
| Rodriguez et al. (2012)  | Real word, comprehension, fluency | WMLS-R Letter Word ID and passage comprehension<br>DIBELS | Phonics and PA                         | 14                               | 3                 | 90                  | 8               | 2160                          |
| Solari & Gerber (2008)   | Real word, nonword                | WJ-III, Word ID and Word Attack                           | PA and comprehension                   | 4 or 5                           | 3                 | 20                  | 8               | 480                           |
| Swartzendruber (2007)    | Comprehension                     | Scholastic Reading Inventory                              | Vocabulary                             | 1                                | 4                 | 20                  | 4               | 320                           |
| Vadasy & Sanders (2010)  | Combined                          | WRMT-R/NU Word ID and Word Attack                         | Phonics                                | 1                                | 4                 | 30                  | 18              | 2160                          |
| Vadasy & Sanders (2011)  | Combined                          | WRMT-R/NU Word ID and Word Attack                         | Phonics                                | 1                                | 4                 | 30                  | 20              | 2400                          |
| Vadasy & Sanders (2015)  | Combined                          | WRMT-R/NU Word ID and Word Attack                         | Vocabulary                             | 1                                | 4                 | 15                  | 14              | 840                           |
| Vadasy et al. (2015)     | Nonword                           | WRMT-R/NU Word Attack                                     | Vocabulary                             | 2 or 3                           | 4                 | 30                  | 20              | 2400                          |
| Vanderwood et al. (2014) | Fluency                           | DIBELS Nonword fluency                                    | PA                                     | Not Reported                     | 5                 | 30                  | 11              | 1650                          |

| Study                   | Reading Outcome(s)                         | Outcome Measure(s)                                                                        | Primary skill targeted in intervention                      | Number of students in each group | Sessions per week | Minutes per session | Number of weeks | Total minutes of intervention |
|-------------------------|--------------------------------------------|-------------------------------------------------------------------------------------------|-------------------------------------------------------------|----------------------------------|-------------------|---------------------|-----------------|-------------------------------|
| Vaughn et al. (2006a)   | Real word, nonword, comprehension, fluency | WLPB-R Letter Word ID, Word Attack, and passage comprehension DIBELS oral reading fluency | Mix (PA, phonics, word recognition, fluency, comprehension) | 3 to 5                           | 5                 | 50                  | Not reported    | 5750                          |
| Vaughn et al. (2006b)   | Nonword, comprehension, fluency            | WLPB-R Word Attack, passage comprehension DIBELS oral reading fluency                     | Mix (PA, phonics, word recognition, fluency, comprehension) | 3 to 5                           | 5                 | 50                  | 28              | 7000                          |
| Vaughn et al. (2017)    | Comprehension                              | Gates–MacGinitie Reading Comprehension Subtest                                            | Mix (comprehension, word, critical reading)                 | 845/49                           | 3                 | 15, 45, 90          | 20              | 1890                          |
| Villanueva (2015)       | Fluency, comprehension                     | Correct Words Per Minute DIBELS, WJ III Comprehension                                     | Fluency                                                     | 4 or 5                           | Not reported      | T1: 20<br>T2: 30    | Not reported    | 240                           |
| Walter (2010)           | Fluency                                    | DIBELS nonword fluency                                                                    | Mix (PA, Phonics)                                           | 8 or fewer                       | 4                 | 20                  | 10              | 800                           |
| Wanzek & Roberts (2012) | Real word, nonword, comprehension          | WJ-III Letter Word ID, Word Attack, and passage comprehension                             | Phonics and comprehension                                   | 2 to 4                           | 4                 | 30                  | 28              | 3360                          |

*Note.* Letter Word ID = Letter Word Identification subtest; PA = phonological awareness; WJ-III = Woodcock-Johnson III Tests of Achievement; WLPB-R = Woodcock Language Proficiency Battery--Revised; WMLS-R = Woodcock-Muñoz Language Survey--Revised; WRAT-3 Reading (Blue form) = Wide Range Achievement Test, Third Edition; WRMT-R = Woodcock Reading Mastery Test--Revised; WRMT-R/NU = Woodcock Reading Mastery Test--Revised/Normative Update; Word Attack = Word Attack subtest; Word ID = Word Identification subtest.
